# Supplementary material
Source: publisher figshare collection journal article supplement (https://diabetesjournals.figshare.com/articles/dataset/_/22236679)
Supplement: Supplementary file 4 [file 1]

## A. Promoter

| Motif | Transcription Factor | % of target regions | p-value |
|-------|----------------------|---------------------|---------|
|       | Mef2a                | 9.01%               | 1 e-11  |
|       | Gata                 | 17.12%              | 1 e-10  |
|       | Tcf3                 | 11.07%              | 1 e-10  |
|       | SP1                  | 7.72%               | 1 e-10  |
|       | Irf7                 | 4.38%               | 1 e-09  |
|       | Prdm15               | 22.52%              | 1 e-08  |
|       | Neurod1              | 14.03%              | 1 e-08  |
|       | Otx1                 | 2.70%               | 1 e-08  |
|       | Ebf2                 | 12.87%              | 1 e-08  |
|       | Smad3                | 18.66%              | 1 e-08  |
|       | Ikzf1                | 9.91%               | 1 e-08  |
|       | Homeobox (i.e. Pdx1) | 9.01%               | 1 e-07  |

## B. Enhancer

| Motif | Transcription Factor | % of target regions | p-value |
|-------|----------------------|---------------------|---------|
|       | Dpe                  | 16.24%              | 1 e-11  |
|       | Hoxd12               | 20.81%              | 1 e-10  |
|       | Zkscan5              | 35.03%              | 1 e-10  |
|       | Neurod1              | 14.21%              | 1 e-10  |
|       | Smad4                | 17.26%              | 1 e-08  |
|       | Zfp105               | 49.75%              | 1 e-08  |
|       | Irf4                 | 8.12%               | 1 e-08  |
|       | Nr4a1                | 14.21%              | 1 e-08  |
|       | Zfp128               | 8.63%               | 1 e-07  |
|       | Zic2                 | 18.78%              | 1 e-07  |
|       | Hic1                 | 14.21%              | 1 e-07  |
|       | Zbtb33               | 8.63%               | 1 e-07  |
