# Supplementary material
Source: publisher figshare collection journal article supplement (https://diabetesjournals.figshare.com/articles/dataset/_/22236679)

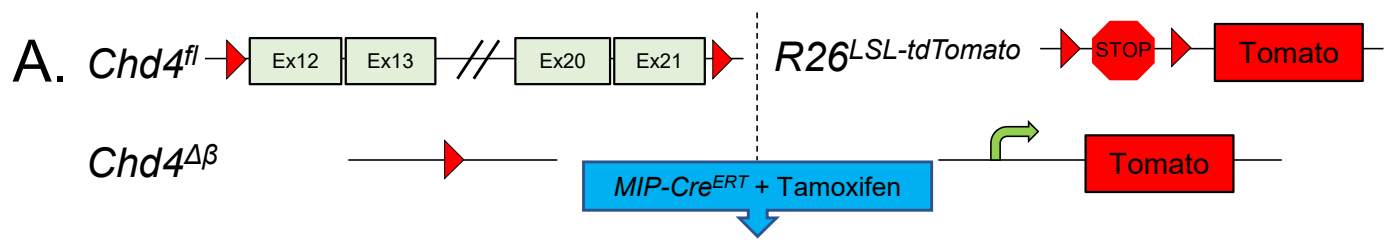

B.

| Control                                                                                           | <i>Chd4<sup>Δβ</sup></i>                                                                           |
|---------------------------------------------------------------------------------------------------|----------------------------------------------------------------------------------------------------|
| <i>Chd4<sup>fl/+</sup>;</i><br><i>R26<sup>LSL-tdTomato</sup>;</i><br><i>MIP-Cre<sup>ERT</sup></i> | <i>Chd4<sup>fl/fl</sup>;</i><br><i>R26<sup>LSL-tdTomato</sup>;</i><br><i>MIP-Cre<sup>ERT</sup></i> |

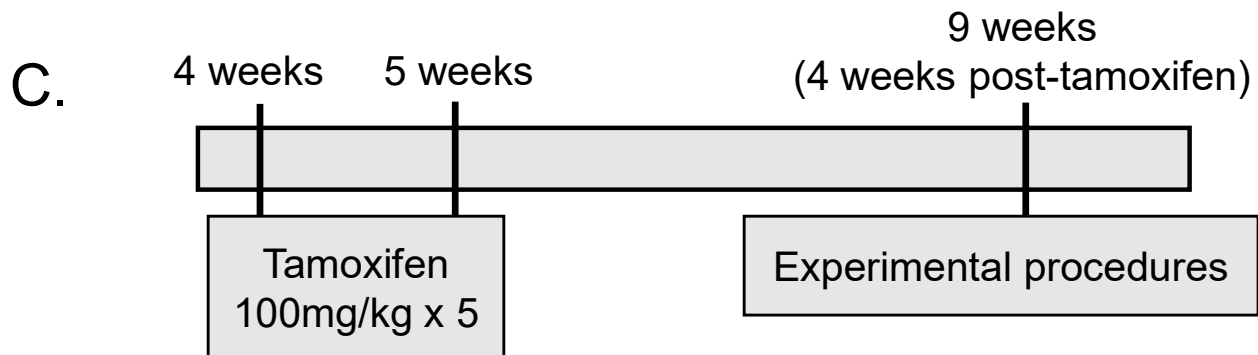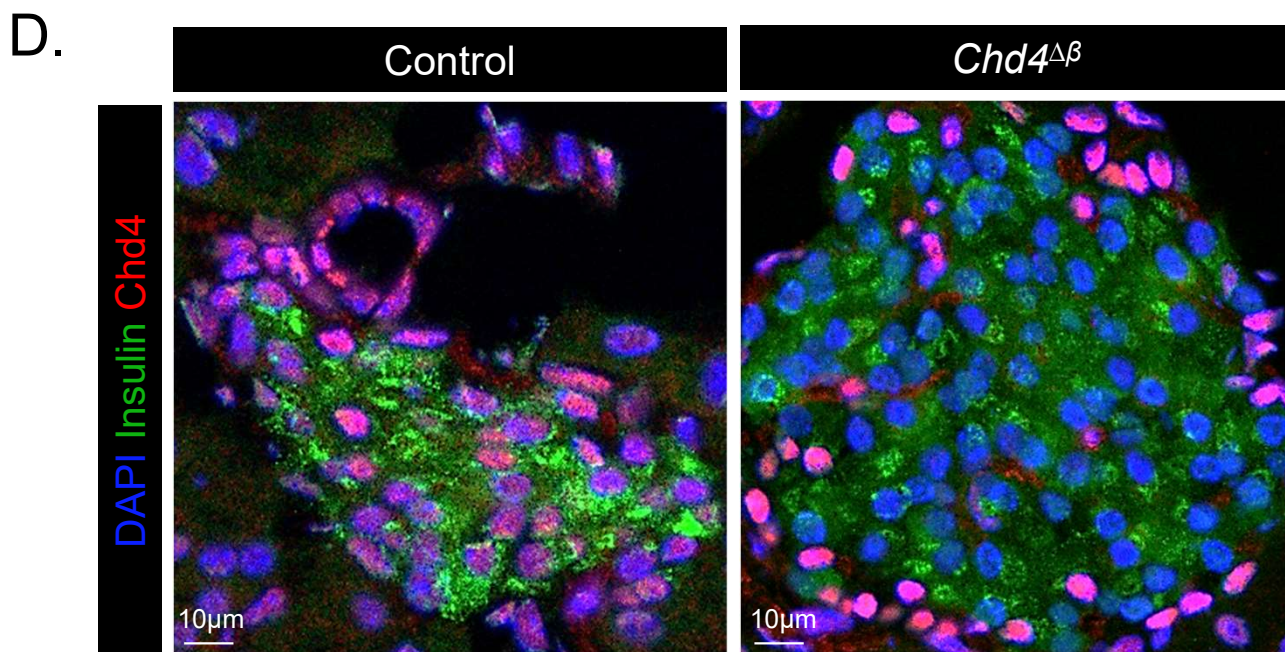

Supplement: Supplementary file 6 [file 1]
