# Supplementary material
Source: publisher figshare collection journal article supplement (https://diabetesjournals.figshare.com/articles/dataset/_/22236679)

—●— *MipCre<sup>ERT</sup>;Chd4<sup>+/-</sup>*    —●— Control    —●— *Chd4<sup>Δβ</sup>*

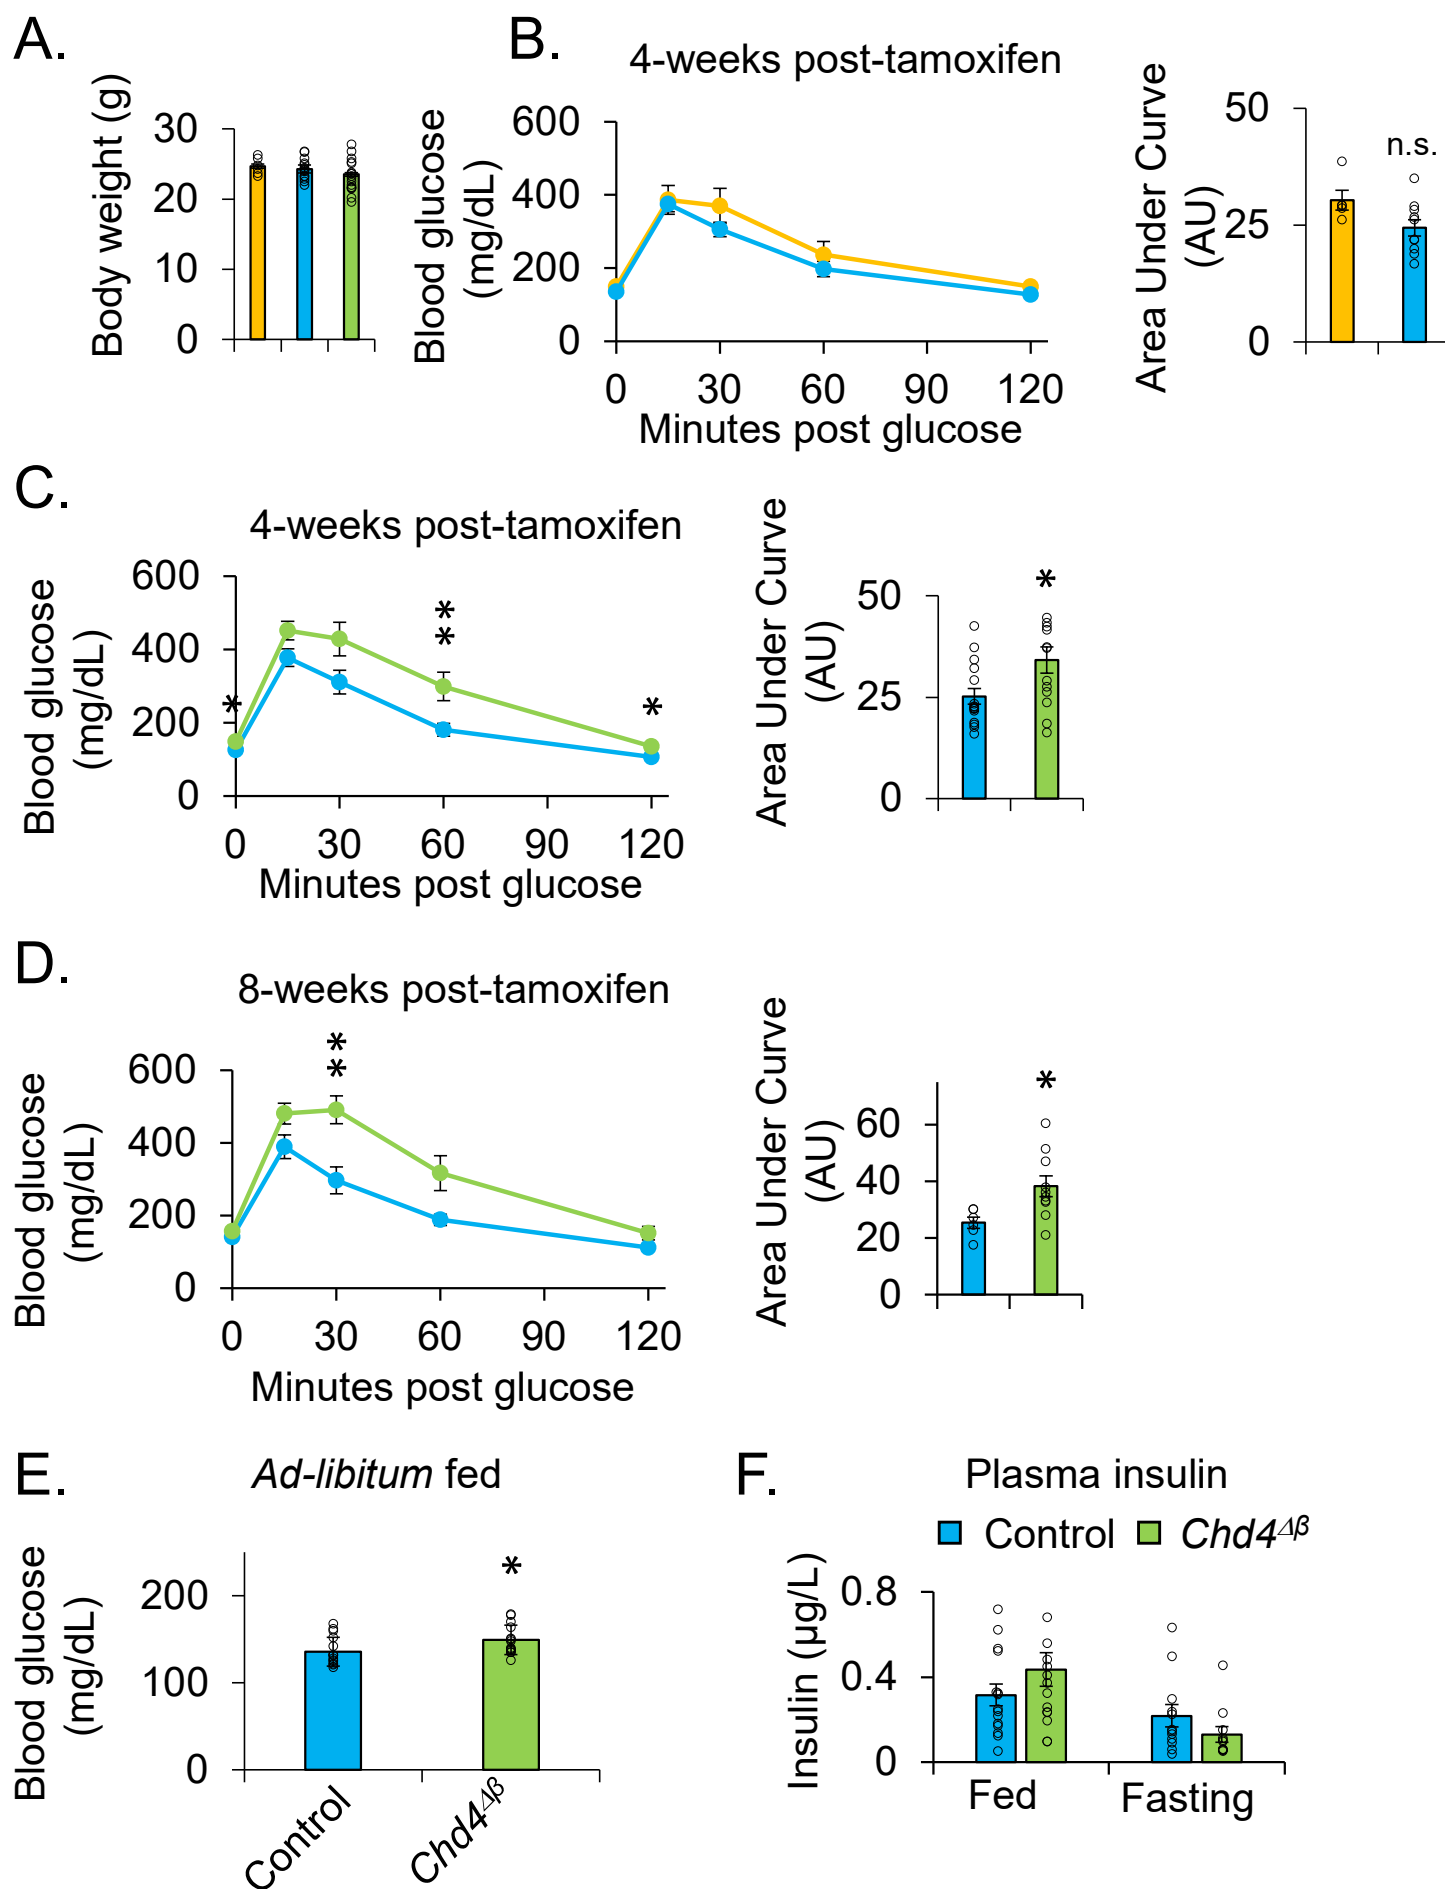

Supplement: Supplementary file 1 [file 1]

Supplemental Figure 5

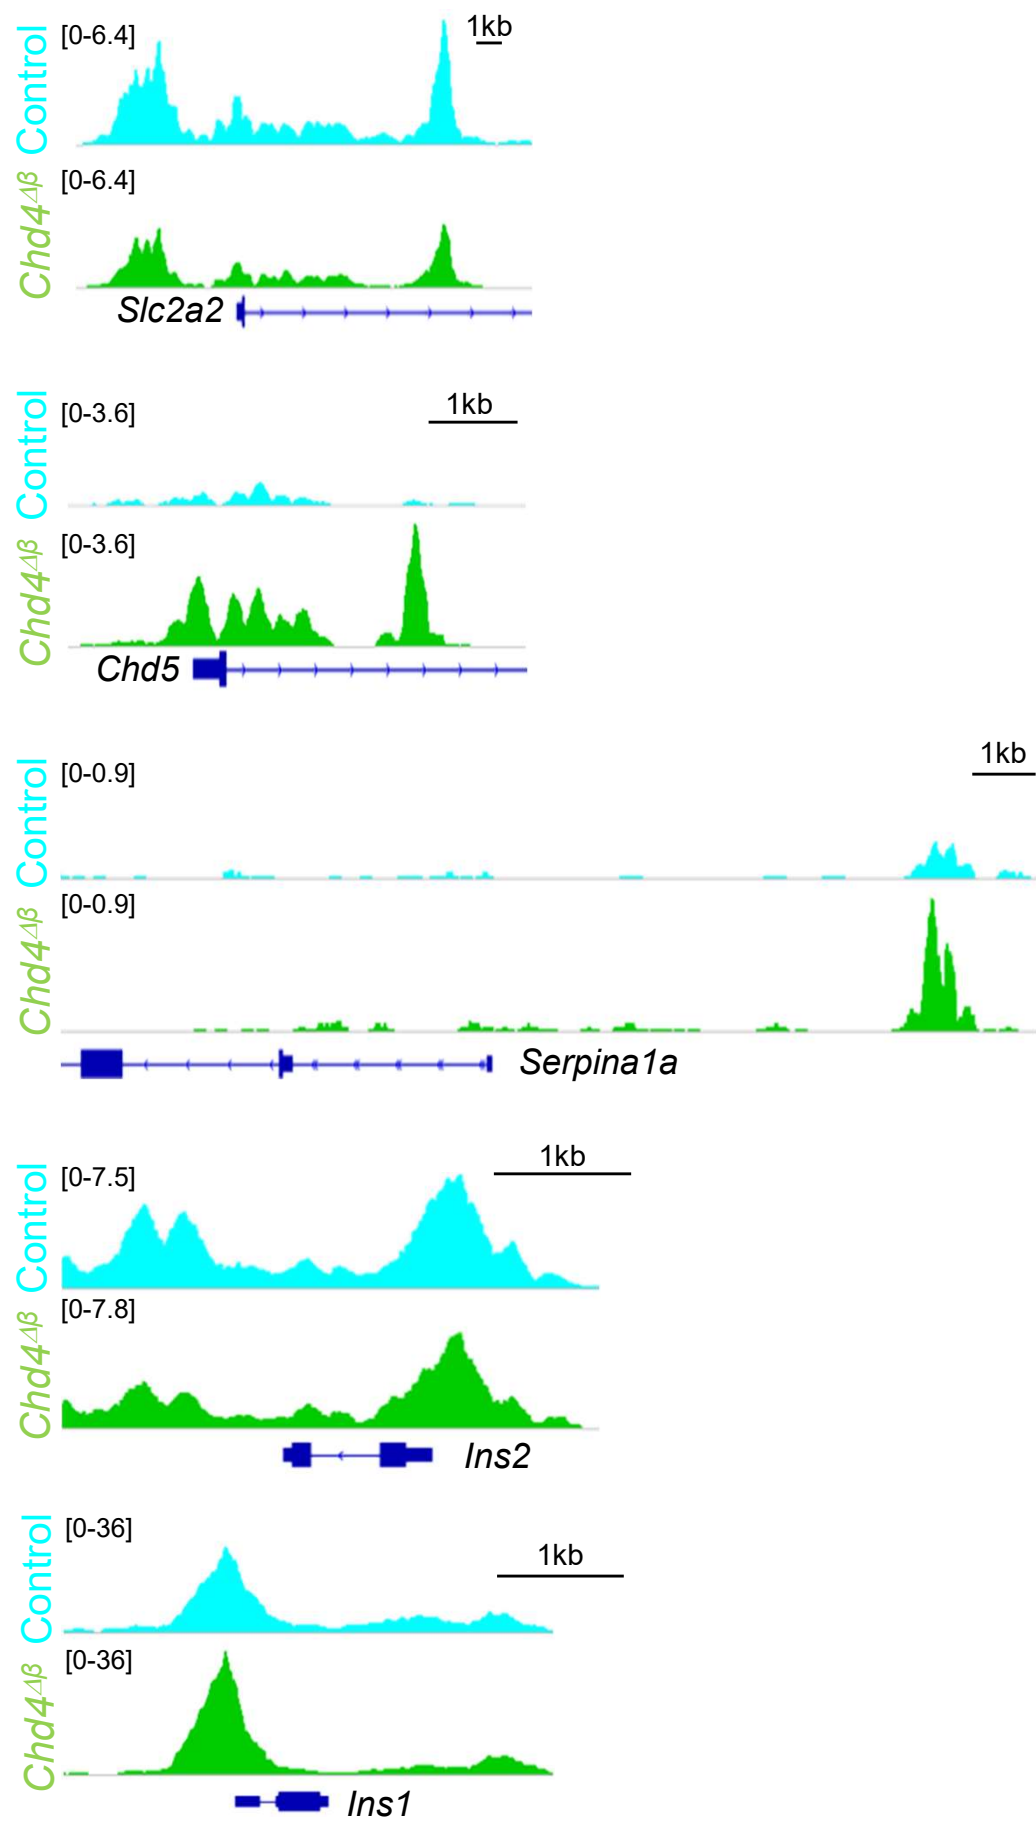

Supplement: Supplementary file 2 [file 1]

Supplemental Figure 7

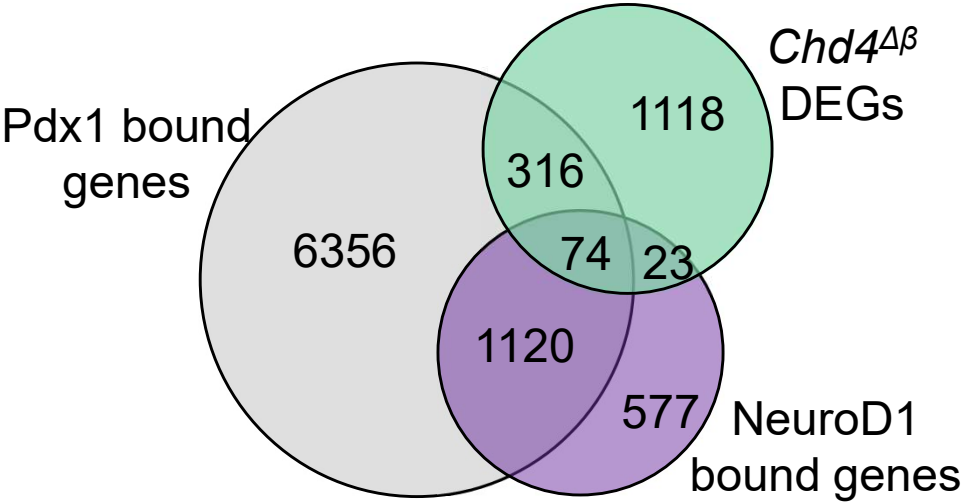

Supplement: Supplementary file 3 [file 1]

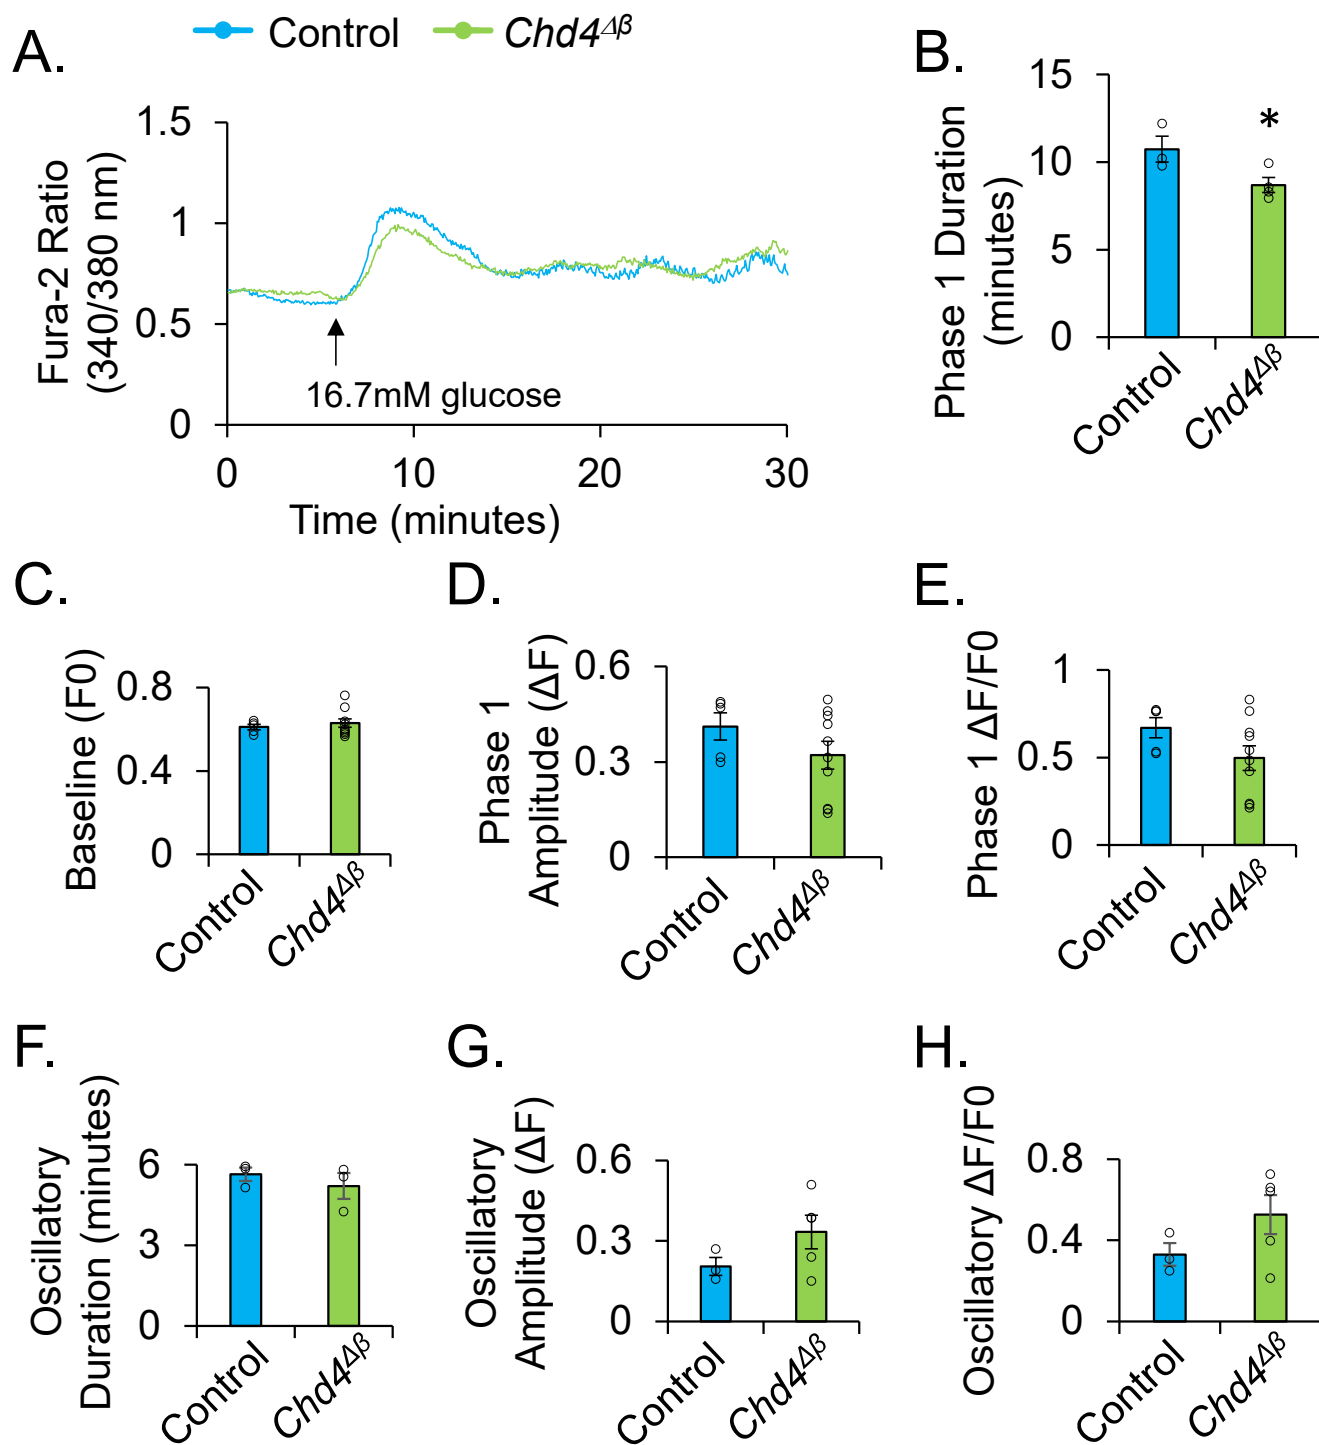

Supplement: Supplementary file 5 [file 1]

Supplemental Figure 4

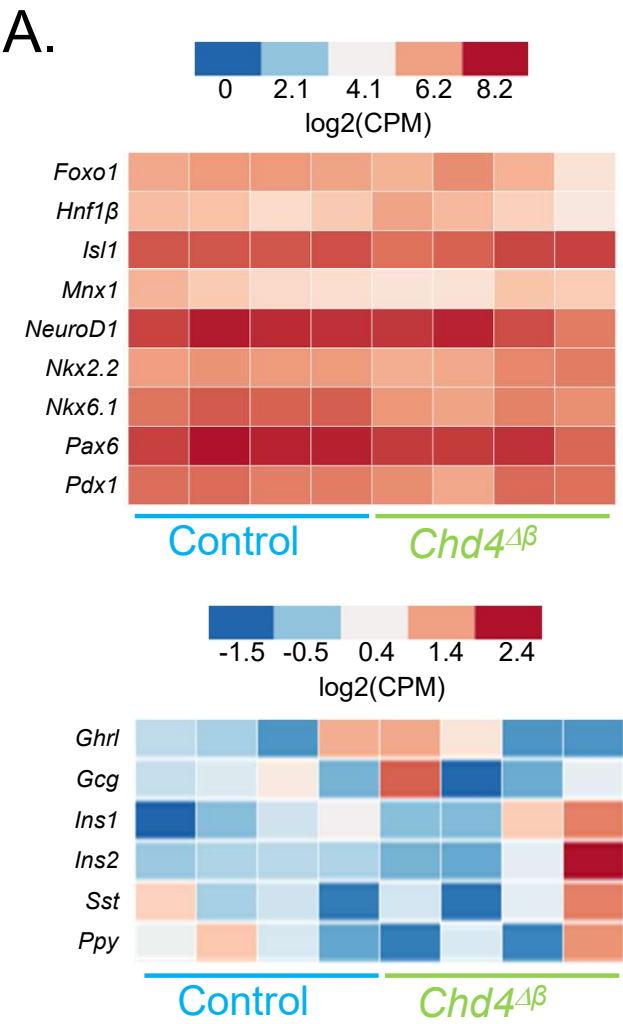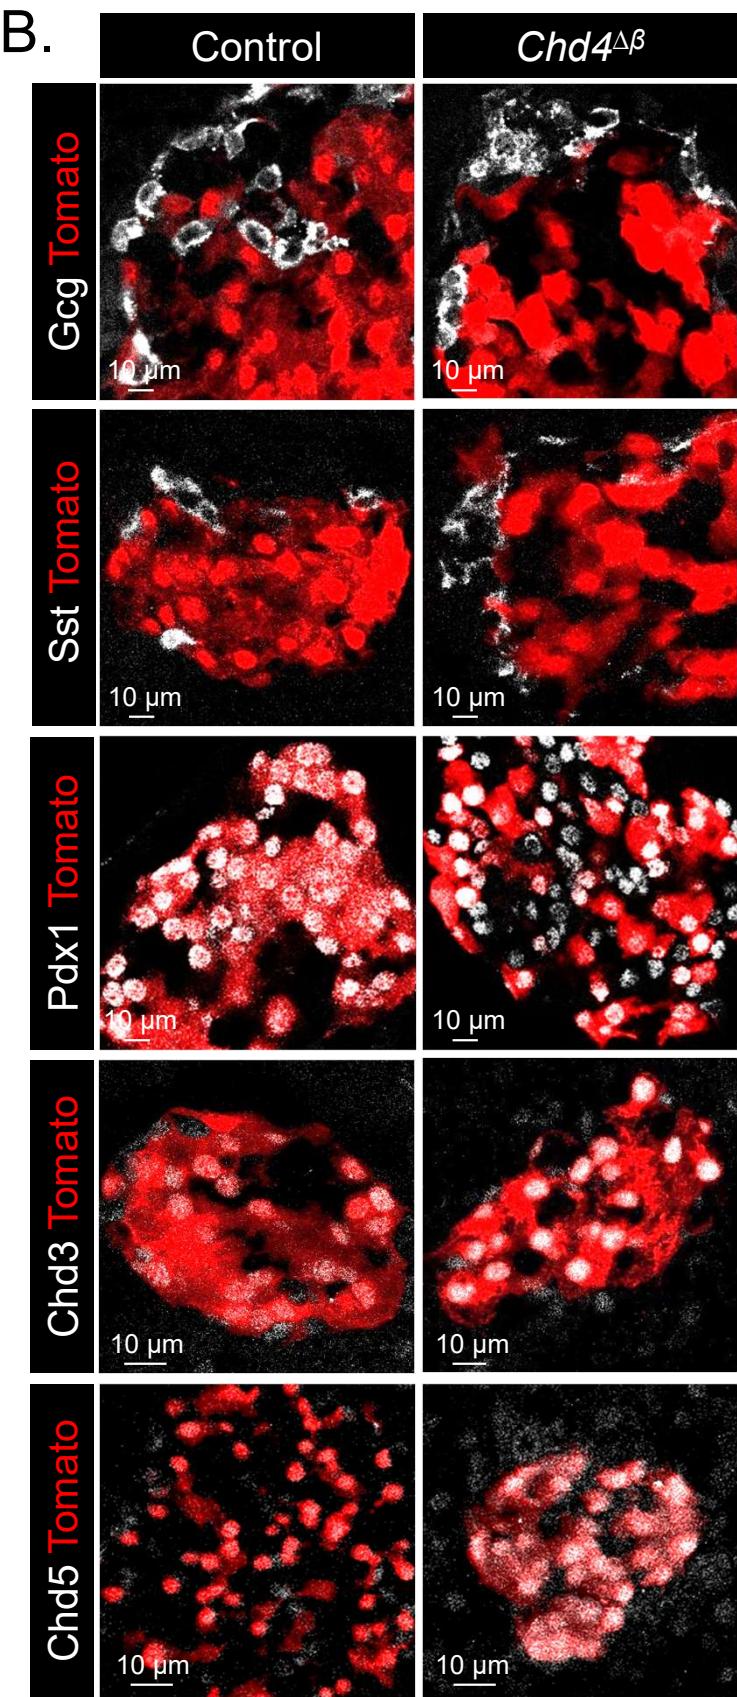

Supplement: Supplementary file 7 [file 1]
